# Supplementary material for: N-type SnO2nanosheets standing on p-type carbon nanofibers: a novel hierarchical nanostructures based hydrogen sensor
Source: Royal Society of Chemistry journal article supplement (doi:10.1039/c5ra08863a), 2015-01-01
Supplement: c5ra08863a1.pdf [file c5ra08863a1.pdf]

## Supplementary Information

### N-type SnO<sub>2</sub> nanosheets stand on p-type carbon nanofibers: A novel hierarchical nanostructures based hydrogen sensor

Zhaojie Wang <sup>a</sup>, Siyuan Liu <sup>b</sup>, Tingting Jiang <sup>c</sup>, Xiuru Xu <sup>b</sup>, Jun Zhang<sup>d</sup>, Changhua An<sup>a, \*</sup> and Ce Wang <sup>b, \*</sup>

<sup>a</sup> Department of Materials Physics and Chemistry, College of Science, China University of Petroleum, Qingdao, 266580, China

<sup>b</sup> Alan G. MacDiarmid Institute, College of Chemistry, Jilin University, Changchun, 130012, China

<sup>c</sup> Department of Catalysis Science and Engineering, School of Chemical Engineering and Technology, Harbin Institute of Technology, Harbin 150001, China

<sup>d</sup> State Key Laboratory of Heavy Oil Processing, College of Chemical Engineering, China University of Petroleum, Qingdao, 266580, China

\*Corresponding author: anchh@upc.edu.cn (C. A.); cwang@jlu.edu.cn (C. W.)

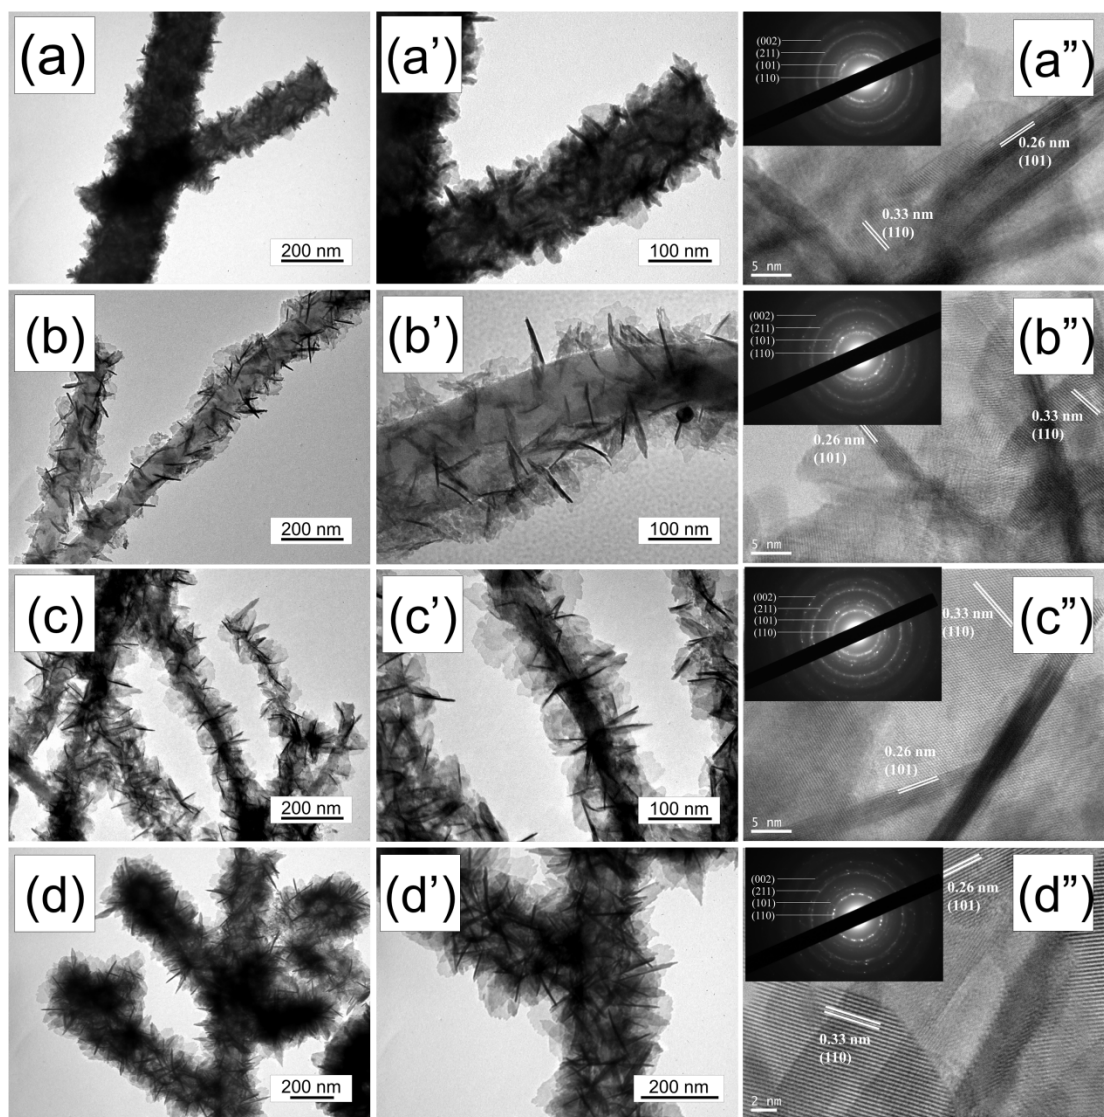

**Fig. S1** Low and high magnified TEM images of SnO<sub>2</sub> nanosheets decorated carbon nanofibers with different hydrothermal reaction time of (a , a' , a'') 3h, (b, b' , b'') 6 h, (c, c' , c'') 12 h, (d, d' , d'') 24 h. The insets are the SAED patterns, respectively.

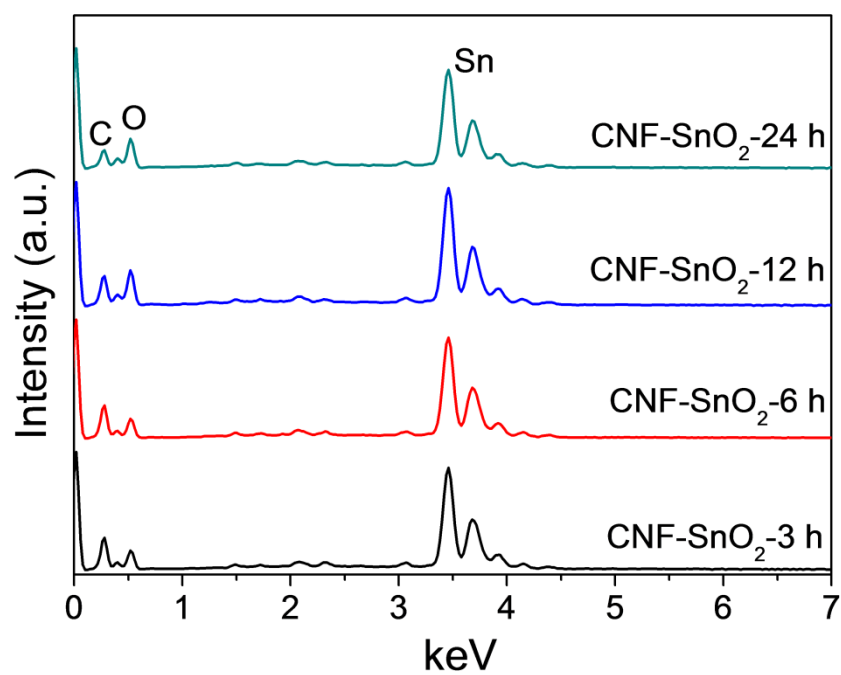

**Fig. S2** EDS analysis of SnO<sub>2</sub> nanosheets decorated carbon nanofibers with different hydrothermal reaction time.

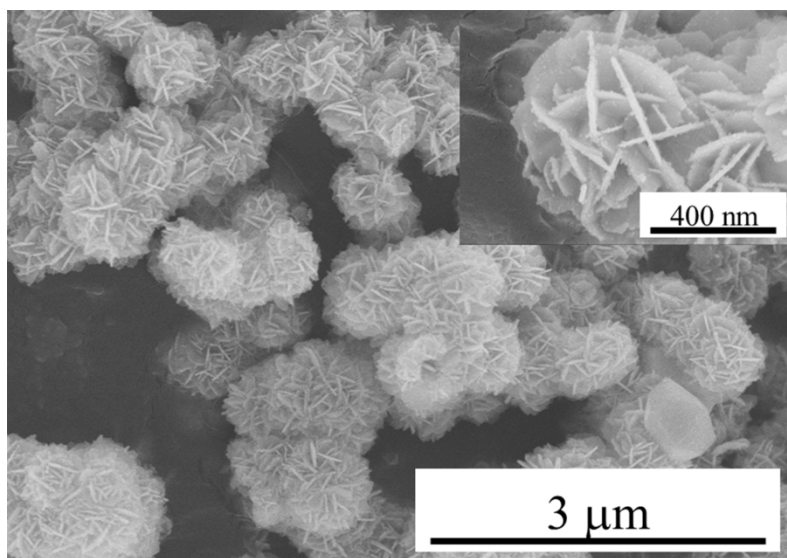

**Fig. S3** SEM images of SnO<sub>2</sub> microspheres assembled by SnO<sub>2</sub> nanosheets obtained by the same hydrothermal method without the presence of CNFs.

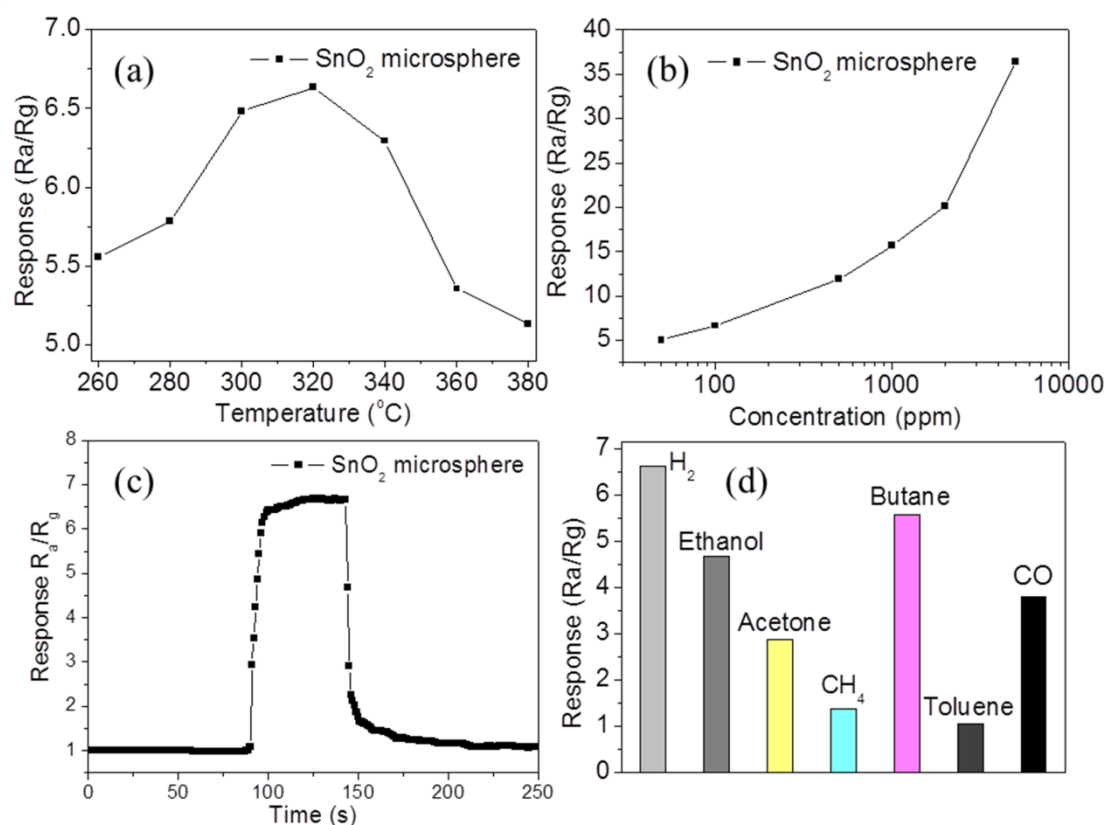

**Fig. S4** (a) Responses of SnO<sub>2</sub> microspheres assembled from SnO<sub>2</sub> nanosheets as a function of operating temperatures. (b) Linear plots of the response of the sensor based on SnO<sub>2</sub> microspheres against H<sub>2</sub> at 320°C. (c) Response and recovery behavior of SnO<sub>2</sub> microspheres to 100 ppm H<sub>2</sub> at 320°C. (d) Response of the optimized sensor to 100 ppm different gases (H<sub>2</sub>, ethanol, acetone, CH<sub>4</sub>, butane, toluene and CO) at 320°C.
